# Supplementary material for: Schiff-Based Fluorescent-ON Sensor L Synthesis and Its Application for Selective Determination of Cerium in Aqueous Media
Source: Hindawi journal article supplement (doi:10.1155/2020/2192584), 2020-04-24
Supplement: f1 [file 2192584.f1.zip]

Archive with 1 entries (1 files):
- 2192584.f1.docx
