# Supplementary material for: Schiff-Based Fluorescent-ON Sensor L Synthesis and Its Application for Selective Determination of Cerium in Aqueous Media
Source: Hindawi journal article supplement (doi:10.1155/2020/2192584), 2020-04-24
Supplement: f1 [file 2192584.f1.zip › 2192584.f1.docx]

**Supplementary file**


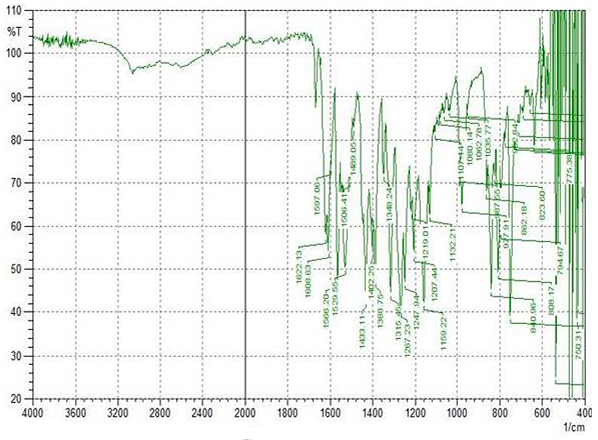


**Figure 1S:** FTIR spectrum of sensor L


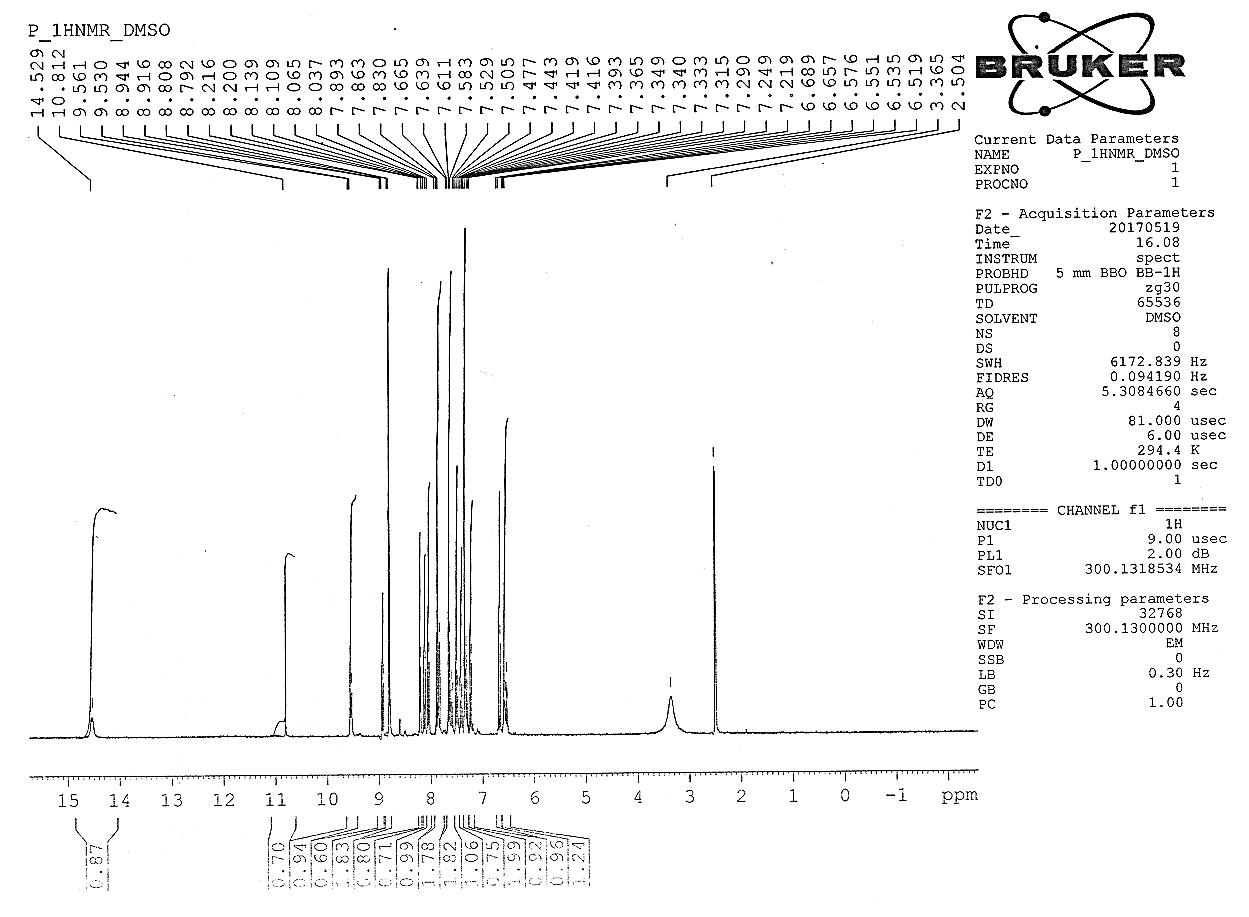


**Figure 2S:** 1HNMR spectrum of sensor L

**Figure 3S:** UV–Vis absorption spectra of sensor L (5μM) at 320 nm and its complex with Ce3+ (20 μM) at 330 nm.

**Figure 4S:** Linear relationship of sensor L complex at 330 nm upon addition of Ce3+ in the range of 2-20 μM.

**Figure 5S:** Fluorescence intensity of sensor L Ce 3+ complex at different excitation wavelengths

**Figure 6S:** Titration curve for sensor L from fluorescence analysis

**Figure 7S:** Titration curve for sensor L from absorbance analysis

**Figure 8S:** Fluorescence emission study of sensor L (5 μM) and changes in the fluorescence intensity of sensor L complex with different metal ions (200μM) with λem 351 nm

**Figure 9S:** Time dependent fluorescence analysis of sensor L and its complex with Ce3+ at 351 nm

**Figure 10S:** Fluorescence emission response of sensor L + Ce3+ (5 + 12 μM respectively) in different solvents, 1. Ethanol/water (2/8) (v/v) 2. Methanol/water (2/8 v/v) 3. Toluene 4. DMSO, 5. Acetone 6. Acetonitrile/water (2/8 v/v) 7. Chloroform, 8. DMF, 9.Dichloromethane.

**Figure 11S:** Fluorescence enhancement curves for sensor L at λem 351 nm upon increase in Ce3+ concentration (5-50 μM)

**Figure 12S:** Fluorescence emission profile of Sensor L versus Ce3+ concentration at λem 351nm

Figure 13S: Job’s plot analysis of sensor L complex with Ce3+, [L] + [Ce3+] is 12 μM at 351 nm.

Figure 14S: Benesi-Hyldebraned plot for the determination of association constant

Figure 15S: Fluorescence intensity at λem351 nm of free sensor L (5 μM) and after addition of Ce3+ (10 μM) as a function of pH at λem 351 nm.

**Figure 16S:** Stability of solution of sensor L and its complex with Ce3+
